# Supplementary material for: Phase transformation and enhanced photocatalytic activity of S-doped Ag2O/TiO2 heterostructured nanobelts
Source: Royal Society of Chemistry journal article supplement (doi:10.1039/c3nr06565k), 2014-01-01
Supplement: c3nr06565k1.pdf [file c3nr06565k1.pdf]

**Phase Transformation and Enhanced Photocatalytic Activity of S-doped  
Ag<sub>2</sub>O/TiO<sub>2</sub> Heterostructured Nanobelts**

W.J. Zhou<sup>\*a</sup>, Y.H. Leng<sup>b</sup>, D.M. Hou<sup>c</sup>, H.D. Li<sup>b</sup>, L.G. Li<sup>a</sup>, G.Q. Li<sup>c</sup>, H. Liu<sup>\*b</sup>, S.W.  
Chen<sup>a,d</sup>

<sup>a</sup> New Energy Research Institute, School of Environment and Energy, South China  
University of Technology, Guangzhou Higher Education Center, Guangzhou 510006,  
China

<sup>b</sup> State Key Laboratory of Crystal Materials, Center of Bio & Micro/Nano Functional  
Materials, Shandong University, 27 Shandan Road, Jinan 250100 China

<sup>c</sup> School of Materials Science and Engineering, South China University of  
Technology, Wushan Road, Tianhe District, Guangzhou 510006, China

<sup>d</sup> Department of Chemistry and Biochemistry, University of California, 1156 High  
Street, Santa Cruz, California 95064, United States

Corresponding Author

E-mail: [eszhouwj@scut.edu.cn](mailto:eszhouwj@scut.edu.cn) (Weijia Zhou); [hongliu@sdu.edu.cn](mailto:hongliu@sdu.edu.cn) (Hong Liu)

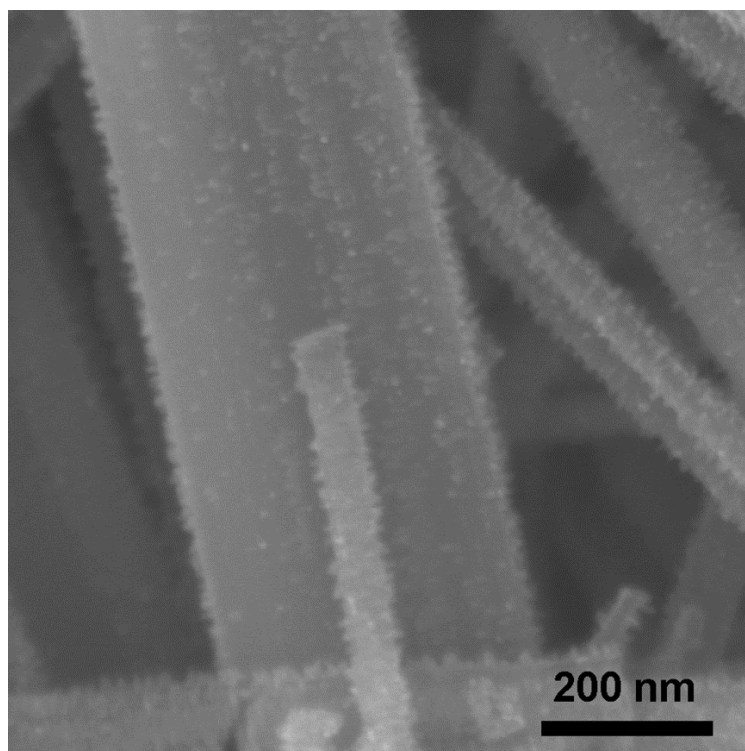

Figure S1 SEM image of acid-corroded TiO<sub>2</sub> nanobelts.

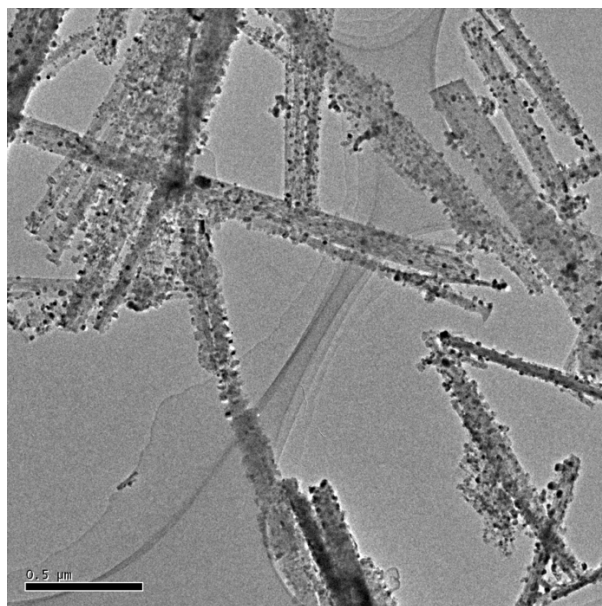

Figure S2 TEM image of Ag<sub>2</sub>S<sub>2</sub>O<sub>7</sub>/TiO<sub>2</sub> (S3) nanobelt heterostructures.

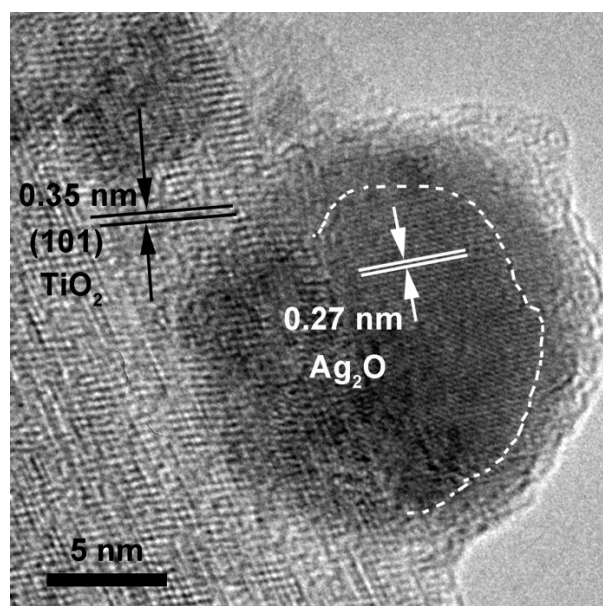

Figure S3. HRTEM image of  $\text{Ag}_2\text{O}/\text{Ag}_2\text{S}_2\text{O}_7/\text{TiO}_2$  (S2) nanobelt heterostructure.

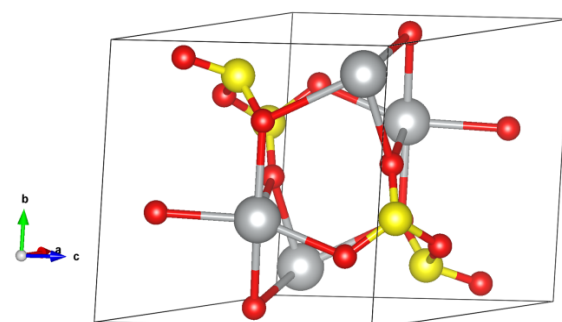

Figure S4. Atomic structure of the unit cell of  $\text{Ag}_2\text{S}_2\text{O}_7$ . Silver, sulfur and oxygen atoms are colored gray, yellow and red, respectively.

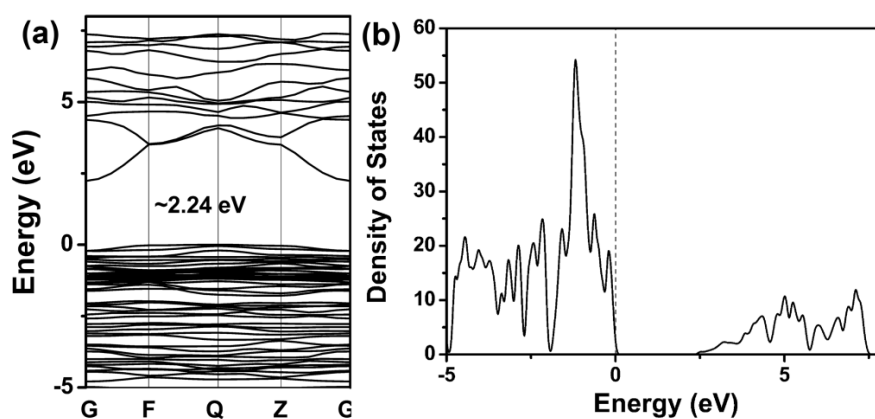

Figure S5. Calculated band structure (a) and electronic density of states (b) for  $\text{Ag}_2\text{S}_2\text{O}_7$ .
